# Supplementary material
Source: publisher figshare collection journal article supplement (https://tandf.figshare.com/articles/dataset/_/11708109)
Supplement: Supplementary file 1 [file 1]

Archive with 4 entries (4 files):
- Roggero S1 Table.pdf
- Roggero S2 Table.pdf
- Roggero S3 Movie.wmv
- Roggero S4 Movie.wmv
