# Supplementary material
Source: publisher figshare collection journal article supplement (https://tandf.figshare.com/articles/dataset/_/11708109)
Supplement: Supplementary file 1 [file 1 › Roggero S1 Table.pdf]

**Table S1.** Measurement values from the specimens belonging to *C. lunaris*. Minor (m\*) and major (m°) males were classified according to Kerman et al. (2018). Pronotum width (*proW*), and cephalic and pronotal horn lengths (*cHL* and *pHL*, respectively) were measured in *mm*, while mean  $\pm$  standard deviation of the length of the toothed row on *pars stridens* (*rPS*) was reported in micrometer ( $\mu\text{m}$ )..

|          | sex | pro_W | c horn_L | p horn_L | t row_L mean    |
|----------|-----|-------|----------|----------|-----------------|
|          |     | mm    |          |          | $\mu\text{m}$   |
| <b>A</b> | m*  | 9.80  | 1.35     | 1.74     | 6.30 $\pm$ 0.47 |
| <b>B</b> | f   | 11.91 | 1.82     | 2.13     | 8.05 $\pm$ 0.60 |
| <b>C</b> | m*  | 10.37 | 3.86     | 3.35     | 7.30 $\pm$ 0.47 |
| <b>D</b> | m°  | 11.98 | 6.40     | 4.90     | 7.90 $\pm$ 0.64 |
| <b>E</b> | f   | 12.00 | 1.69     | 2.21     | 7.55 $\pm$ 0.51 |
| <b>F</b> | m°  | 12.08 | 6.29     | 4.36     | 8.25 $\pm$ 0.44 |
| <b>G</b> | m°  | 11.65 | 5.89     | 4.32     | 8.40 $\pm$ 0.60 |
| <b>H</b> | f   | 11.95 | 1.79     | 2.17     | 8.20 $\pm$ 0.62 |
| <b>I</b> | f   | 11.47 | 1.682    | 2.02     | 7.65 $\pm$ 0.49 |
| <b>J</b> | m*  | 10.28 | 3.262    | 2.71     | 6.40 $\pm$ 0.49 |
| <b>K</b> | m*  | 10.32 | 3.50     | 2.77     | 7.20 $\pm$ 0.40 |
| <b>L</b> | f   | 10.89 | 1.66     | 1.74     | 6.95 $\pm$ 0.60 |
| <b>M</b> | f   | 11.11 | 1.88     | 1.98     | 7.65 $\pm$ 0.49 |
| <b>N</b> | m°  | 11.53 | 5.99     | 4.13     | 7.65 $\pm$ 0.49 |
| <b>O</b> | f   | 11.16 | 1.60     | 1.98     | 7.75 $\pm$ 0.55 |
| <b>P</b> | f   | 11.65 | 1.86     | 2.30     | 8.40 $\pm$ 0.60 |
| <b>Q</b> | f   | 11.46 | 1.79     | 2.13     | 7.80 $\pm$ 0.40 |
| <b>R</b> | f   | 10.40 | 1.34     | 1.70     | 6.90 $\pm$ 0.45 |
| <b>S</b> | f   | 10.05 | 1.21     | 1.65     | 7.00 $\pm$ 0.46 |
| <b>T</b> | m*  | 9.78  | 2.14     | 2.19     | 6.30 $\pm$ 0.46 |
