# Supplementary material
Source: publisher figshare collection journal article supplement (https://tandf.figshare.com/articles/dataset/_/11708109)
Supplement: Supplementary file 1 [file 1 › Roggero S2 Table.pdf]

**Table S2.** The number of stridulation types observed in *C. lunaris*. Incomplete stridulations with only subunit A present (*sA*), incomplete stridulations with only subunit B present (*sB*), and complete stridulations where both subunits were present (*sAB*). Groups were classified as females (f), minor males (m\*), and major males (m°). At the bottom part of the table, the overall mean  $\pm$  standard deviation of each group was reported.

| ID | sex | <i>sA</i>           | <i>sB</i>       | <i>sAB</i>         |
|----|-----|---------------------|-----------------|--------------------|
| A  | m*  | 35                  | 6               | 601                |
| B  | f   | 60                  | 1               | 135                |
| C  | m*  | 6                   | 0               | 26                 |
| D  | m°  | 350                 | 0               | 28                 |
| E  | f   | 392                 | 6               | 116                |
| F  | m°  | 267                 | 2               | 76                 |
| G  | m°  | 405                 | 0               | 3                  |
| H  | f   | 257                 | 0               | 47                 |
| I  | f   | 105                 | 5               | 259                |
| L  | f   | 91                  | 5               | 398                |
| M  | f   | 438                 | 4               | 8                  |
| N  | m°  | 300                 | 3               | 219                |
| O  | f   | 519                 | 0               | 24                 |
| P  | f   | 270                 | 0               | 30                 |
| Q  | f   | 212                 | 1               | 167                |
| R  | f   | 128                 | 3               | 238                |
| S  | f   | 72                  | 3               | 195                |
|    | m*  | 20.5 $\pm$ 20.51    | 3 $\pm$ 4.24    | 313.5 $\pm$ 406.59 |
|    | m°  | 330.5 $\pm$ 60.26   | 1.25 $\pm$ 1.5  | 81.5 $\pm$ 96.5    |
|    | f   | 231.27 $\pm$ 159.65 | 2.55 $\pm$ 2.25 | 147 $\pm$ 120.74   |
